# Supplementary material
Source: PubMed Central journal article supplement (PMC4640444)

## Supplementary Fig. 1

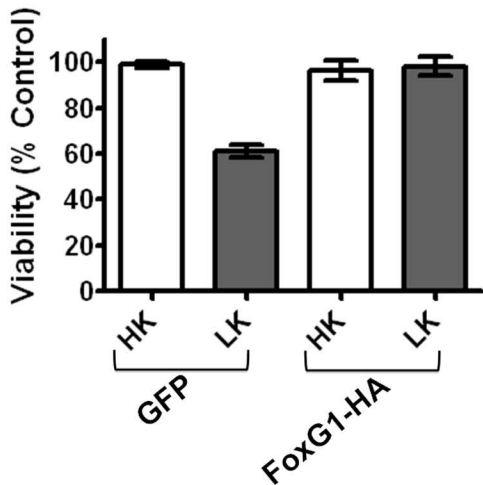

## Supplementary Fig. 2

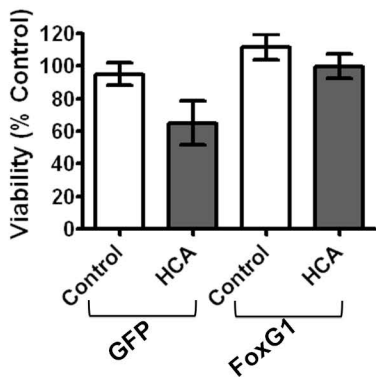

Supplement: NIHMS733160-supplement-Supplemental_Figures.pdf [file NIHMS733160-supplement-Supplemental_Figures.pdf]
